# Supplementary material for: Controlled release of silibinin in GelMA hydrogels inhibits inflammation by inducing M2-type macrophage polarization and promotes vascularization in vitro
Source: PubMed Central journal article supplement — RSC Adv. 2022 May 3;12(21):13192–202. doi: 10.1039/d2ra00498d (PMC9064440; doi:10.1039/d2ra00498d), 2022-05-03
Supplement: RA-012-D2RA00498D-s001.pdf [file RA-012-D2RA00498D-s001.pdf]

Table 1 The primers for the target genes used in real-time PCR.

| Gene          | Primer sequences (5'-3')  |
|---------------|---------------------------|
| IL-10         | F: TTCTTTCAAACAAAGGACCAGC |
|               | R: GCAACCCAAGTAACCCTTAAAG |
| VEGF $\alpha$ | F: TAGAGTACATCTTCAAGCCGTC |
|               | R: CTTTCTTTGGTCTGCATTCACA |
| CD206         | F: CCTATGAAAATTGGGCTTACGG |
|               | R: CTGACAAATCCAGTTGTTGAGG |
